# Supplementary material
Source: Research Square preprint supplement (doi:10.21203/rs.3.rs-7623012/v1)
Supplement: Supplementary file 1 [file 94bdcd8264871a9b381ec318.docx]

### **Supplementary file 2: the major resistant associated mutations (RAM) with NRTI, NNRTI and PI at inclusion (N=49).**

(a) Prevalence of different nucleoside reverse transcriptase inhibitor (NRTI)-related HIV-1 resistance mutations (n=49).

(b) Prevalence of different non-NRTI related HIV-1 resistance mutations (n=49).

(c) Prevalence of different protease inhibitor (PI)-related HIV-1 resistance mutations (n=49).
