# Supplementary material
Source: Research Square preprint supplement (doi:10.21203/rs.3.rs-7623012/v1)
Supplement: Supplementary file 3 [file b4d54de619a0caade6685b00.pdf]

## ANRS 12374 3DICAM Study

### List of Research Teams

| N°                                                                       | First name & Full name   | Role                                 |
|--------------------------------------------------------------------------|--------------------------|--------------------------------------|
| <b>Inserm/ ANRS</b>                                                      |                          |                                      |
| 1                                                                        | Dr Nicolas Rouveau       | Sponsor                              |
| 2                                                                        | Dr Alpha Diallo          | Sponsor                              |
| 3                                                                        | Dr Stephany Pong         | Sponsor                              |
| 4                                                                        | Dr Anne-Marie Taburet    | Pharmacologist                       |
| 5                                                                        | Dr Joséphine Balssa      | Pharmacovigilance                    |
| 6                                                                        | Ms Laura Fernandez       | Project Manager                      |
| 7                                                                        | Dr Luis Sagaon Teyssier  | Costing Analysis                     |
| <b>Service de Médecine Interne et Immunologie Clinique - CHU Bicêtre</b> |                          |                                      |
| 1                                                                        | Pr Cécile Goujard        | Investigator Coordinator             |
| <b>National Center for HIV/AIDS, Dermatology and STD</b>                 |                          |                                      |
| 1                                                                        | Dr Ly Penhsun            | Investigator Coordinator             |
| 2                                                                        | Dr Ouk Vichea            | Investigator Coordinator             |
| 3                                                                        | Dr Samret Sovannarith    | Clinical Coordinator                 |
| 4                                                                        | Dr Ngauv Bora            | Co-investigator                      |
| 5                                                                        | Dr Khol Vohith           | Co-investigator                      |
| 6                                                                        | Dr Mom Chandara          | Virologist                           |
| 7                                                                        | Ms Pich Sopanha          | NCHADS Lab technician                |
| <b>Coordination Center at University of Health Sciences</b>              |                          |                                      |
| 1                                                                        | Pr Saphonn Vonthanak     | Methodology Coordinator              |
| 2                                                                        | Dr Oliver Ségéral        | Clinical Coordinator                 |
| 3                                                                        | Dr Pheng Phearavin       | Head of Project                      |
| 4                                                                        | Mr Mam Sovatha           | System development and data manament |
| 5                                                                        | Ms Chhoung Chanroth      | Clinical Research Assisstant         |
| 6                                                                        | Mrs Lip Kimhuy           | Clinical Research Assisstant         |
| 7                                                                        | Mr Neth Inrasothythep    | Clinical Research Assisstant         |
| 8                                                                        | Ms Ly Rachana            | Clinical Research Assisstant         |
| 9                                                                        | Pr Chuo Monidarin        | Pharmacologist                       |
| 10                                                                       | Mrs Phoeung Chanleakhena | UHS Lab Technician                   |
| <b>Study Site: Social Health Clinic( SHC)</b>                            |                          |                                      |
| 1                                                                        | Dr Bun Vannary           | Investigator                         |
| 2                                                                        | Mrs Pech Seila           | Nurse                                |
| 3                                                                        | Mrs Leng Kimseak         | Nurse                                |
| 4                                                                        | Mrs Chhoeun Sokkim       | Counselor                            |
| 5                                                                        | Mrs Heng Sophea          | Pharmacist                           |
| <b>Study Site: Sihanouk Hospital Center of Hope( SHCH)</b>               |                          |                                      |
| 1                                                                        | Dr Phe Thong             | Investigator                         |
| 2                                                                        | Dr Soeung Sunpisith      | Investigator                         |
| 3                                                                        | Mrs San Sokleang         | Nurse                                |
| 4                                                                        | Mrs Khem Soklida         | Counselor                            |
| 5                                                                        | Ms Chin Sophal           | Blood Sampling                       |
| 6                                                                        | Mrs Pich Chanthida       | Pharmacist                           |
| <b>Study Site: Khmer Soviet Friendship Hospital(KSFH)</b>                |                          |                                      |

|                                                                 |                     |                  |
|-----------------------------------------------------------------|---------------------|------------------|
| 1                                                               | Dr Ngeth Chanchhaya | Investigator     |
| 2                                                               | Dr Prak Narom       | Investigator     |
| 3                                                               | Dr Chhneang Virin   | Investigator     |
| 5                                                               | Mrs Sovann Reatry   | Counselor        |
| 4                                                               | Mrs Heam Pov        | Blood Sampling   |
| 6                                                               | Mrs Suk Niseth      | Pharmacist       |
| <b>Study Site: Siem Reap Provincial Hospital</b>                |                     |                  |
| 1                                                               | Dr Bin Boniroath    | Investigator     |
| 2                                                               | Dr Yin Lyda         | Investigator     |
| 3                                                               | Mrs Ly Yoklim       | Nurse            |
| 4                                                               | Mrs Say Pagna       | Counselor        |
| 5                                                               | Mrs Preap Suntara   | Counselor        |
| 6                                                               | Mr Chhut Seng       | Blood Sampling   |
| 7                                                               | Mrs Mok Ukveasna    | Pharmacist       |
| <b>Study Site: National Pediatric Hospital</b>                  |                     |                  |
| 1                                                               | Dr Huot Chantheany  | Investigator     |
| 2                                                               | Dr Lim Peou         | Investigator     |
| 3                                                               | Mrs Khin Sokoeun    | Nurse/Counsellor |
| <b>Study Site: Battambang Provincial Referral Hospital</b>      |                     |                  |
| 1                                                               | Dr Kao Bou          | Investigator     |
| 2                                                               | Mr Heng Bunrath     | Investigator     |
| 3                                                               | Mr So Rath          | Nurse            |
| 4                                                               | Ms Meth Sathya      | Counselor        |
| <b>Study Site: Calmette Hospital</b>                            |                     |                  |
| 1                                                               | Dr Limsreng Setha   | Investigator     |
| 2                                                               | Dr Vann Pisey       | Investigator     |
| 3                                                               | Mr Pao Samaun       | Nurse            |
| 4                                                               | Mr Oem Him          | Nurse            |
| 5                                                               | Mrs Kim Bopiseth    | Counselor        |
| <b>Study Site: Takeo Provincial Referral Hospital</b>           |                     |                  |
| 1                                                               | Dr Kuoch Sokhan     | Investigator     |
| 2                                                               | Dr Neak Vibol       | Investigator     |
| 3                                                               | Ms Am Sreynich      | Nurse            |
| 4                                                               | Mrs Meas Huch       | Nurse            |
| 5                                                               | Mrs Tieng Sophary   | Counselor        |
| <b>Study Site: Kampong Cham Provincial Referral Hospital</b>    |                     |                  |
| 1                                                               | Dr Hong Rotha       | Investigator     |
| 2                                                               | Mr Pang Tongeng     | Nurse            |
| 3                                                               | Mrs Him Thearat     | Consellor        |
| <b>Study Site: Kampong Chhnang Provincial Referral Hospital</b> |                     |                  |
| 1                                                               | Dr Ong Dara         | Investigator     |
| 2                                                               | Mrs Ou Sophyna      | Investigator     |
| 3                                                               | Mr Nuth Sarin       | Nurse/Counsellor |
| <b>Study Site: Prey Veng Provincial Referral Hospital</b>       |                     |                  |
| 1                                                               | Dr Ly Bunthoern     | Investigator     |
| 2                                                               | Mr Sam Kea          | Nurse            |
| 3                                                               | Mrs Has Channa      | Counselor        |

|                                                                |                         |                           |
|----------------------------------------------------------------|-------------------------|---------------------------|
| 4                                                              | Mrs Nav Chandyna        | Pharmacist                |
| <b>Study Site: Preah Sihanouk Provincial Referral Hospital</b> |                         |                           |
| 1                                                              | Dr Som Dara             | Investigator              |
| 2                                                              | Dr Nhok Meth            | Investigator              |
| 3                                                              | Mrs Ouk Pheary          | Nurse                     |
| 4                                                              | Mrs Say Sokha           | Counselor                 |
| 5                                                              | Mr Un Chan thou         | Blood Sampling            |
| 6                                                              | Mrs Tath Thida          | Pharmacist                |
| <b>Scientific Committee</b>                                    |                         |                           |
| 1                                                              | Pr Cécile Goujard       | HIV infection             |
| 2                                                              | Dr Ouk Vichea           | HIV infection             |
| 3                                                              | Dr Oliver Ségéral       | Clinical Coordinator      |
| 4                                                              | Dr Samret Sovannarith   | Clinical Coordinator      |
| 5                                                              | Dr Pheng Phearavin      | Methodology and Statistic |
| 6                                                              | Ms Laura Fernandez      | Clinical Research         |
| 7                                                              | Dr Laurent Ferradini    | HIV infection             |
| 8                                                              | Dr Anne-Marie Taburet   | Pharmacologist            |
| 9                                                              | Pr Chou Monidarin       | Pharmacologist            |
| 10                                                             | Dr Aurélie Barrail-TRAN | Pharmacologist            |
| 11                                                             | Dr Herb Harwell         | HIV infection             |
| 12                                                             | Dr Mom Chandara         | Virologist                |
| 13                                                             | Dr Joséphine Balssa     | Pharmacovigilance         |
| 14                                                             | Dr Remonie Seng         | Methodology and Statistic |
| 15                                                             | Dr Luis Sagaon Teyssier | Economist                 |
| 16                                                             | Dr Nouhin Janin         | Virologist                |
| <b>DSMB</b>                                                    |                         |                           |
| 1                                                              | Isabelle Charreau       | Statistician              |
| 2                                                              | Charlotte Charpentier   | Virologist                |
| 3                                                              | Alexandra Calmy         | Clinician, President      |
